# Supplementary material
Source: PubMed Central journal article supplement (PMC4361264)
Supplement: NIHMS639469-supplement-Supp_TableS1.pdf [file NIHMS639469-supplement-Supp_TableS1.pdf]

**siRNA duplexes against PRB**

5' -UCCAGAGCUGAAGCUACAA-3'  
 5' - UUGUAGCUUCAGCUCUGGA-3'

**Primers used in qPCR and ChIP studies**

## Primers for qPCR

|              |           |                              |
|--------------|-----------|------------------------------|
| <i>PR</i>    | Sense     | 5' -GATTCAGAAGCCAGCCAGAG-3'  |
|              | Antisense | 5' -GACCTTACAGCTCCCACAGG-3'  |
| <i>PRB</i>   | Sense     | 5' -GCAGCCGCAGCCACTCAAGT-3'  |
|              | Antisense | 5' -TTTGTCCCAGCGAGCGGCA-3'   |
| <i>MYC</i>   | Sense     | 5' -ACGGCCGACCAGCTGGAGAT-3'  |
|              | Antisense | 5' -TCGTTCGTCCGGGTCGCAGAT-3' |
| <i>CCND1</i> | Sense     | 5' -CGTGCCCGTGTGCATGTCCT-3'  |
|              | Antisense | 5' -GTGGCCTTTCCCGACCCTGC-3'  |
| <i>SMRT</i>  | Sense     | 5' -GATCGGCACCGCCACTT-3'     |
|              | Antisense | 5' -AAGCCAGTCCTCGTCATCAG-3'  |
| <i>GAPDH</i> | Sense     | 5' -GAGTCAACGGATTTGGTCGT-3'  |
|              | Antisense | 5' -TTGATTTTGGAGGGATCTCG-3'  |

## Primers for ChIP/qPCR

|                           |           |                               |
|---------------------------|-----------|-------------------------------|
| <i>MYC</i><br>Promoter*   | Sense     | 5' -TTCGGACCTTCTGCAGCCAACC-3' |
|                           | Antisense | 5' -TGCAAGGTTTCCAGCGGGGG-3'   |
| +5/6 Kb region*           | Sense     | 5' -CCTCCCAACCACCACCATCCCT-3' |
|                           | Antisense | 5' -GACCTTAAGGCCCCAGACCC-3'   |
| <i>CCND1</i><br>Promoter* | Sense     | 5' -CCTGCTGGGGCAACCCATCG-3'   |
|                           | Antisense | 5' -CCCTCCCCCGCCGGGAATTA-3'   |
| +5/6 Kb region*           | Sense     | 5' -GCCCACTACTGCAGCCTGGC-3'   |
|                           | Antisense | 5' -GGCGGCCCATCAGCCTTTGT-3'   |

\*: Primers previously used to detect specific PR recruitment to *CCND1* and *MYC* promoters described in Cerliani *et al.*, 2011 and Giulianelli *et al.*, 2012.
